# Supplementary material
Source: HighWire-hosted journal article supplement (https://bmjopen.bmj.com/content/13/9/e073761)
Supplement: inline-supplementary-material-1 [file inline-supplementary-material-1.pdf]

**Dietary Supplements to Reduce Symptom Severity and Duration in People with SARS-CoV-2: A Double Blind, Placebo Controlled, Phase III Randomized Controlled Trial**

*Supplementary Materials*

**Section 1: Symptom Questionnaire**

Below is a list of symptoms people with COVID-19 may experience. **Please mark one option per question to indicate your response.** It does not matter what time of day you fill out the questionnaire, but we ask that you try and fill out each questionnaire around the same time each day. Please fill in the date you completed this questionnaire at the top of the page.

---

1. What was your oral temperature today?  <37.7°C  37.7 – 38.9°C  39.0 – 39.9°C  ≥ 40°C

[Please wait 30 minutes after drinking any fluids before taking your temperature]

---

2. Please rate the severity of the below symptoms **at their worst** over the past 24 hours. In general, “Mild” means noticeable but not affecting your usual daily activities and “Severe” would have a strong impact on your usual daily activities such that you are not able to do some or most of the things you normally do in a day.

- Cough  None  Mild  Moderate  Severe
  - Shortness of breath  None  Mild  Moderate  Severe
  - Fatigue  None  Mild  Moderate  Severe
  - Headaches  None  Mild  Moderate  Severe
  - Body Aches  None  Mild  Moderate  Severe
  - Nausea (feeling like throwing up)  None  Mild  Moderate  Severe
  - Shakes or chills  None  Mild  Moderate  Severe
  - Congestion  None  Mild  Moderate  Severe
  - Loss of Smell  None  Mild  Moderate  Severe
  - Loss of Taste  None  Mild  Moderate  Severe
- 

3. How often have you vomited in the past 24 hours?  Not at all  1-2 times  3-4 times  5+ times

4. How often have you had diarrhea in the past 24 hours?  Not at all  1-2 times  3-4 times  5+ times
-

Table S1: Full list of Adverse Events

| Allocation | Event             | Classification                                  | Serious | Expected | Start Date | End Date  | Grade | Related to Intervention | Action Taken |
|------------|-------------------|-------------------------------------------------|---------|----------|------------|-----------|-------|-------------------------|--------------|
| Control    | Headache          | Nervous System Disorders                        | No      | No       | 18-Dec-21  | 19-Dec-21 | 1     | Unlikely                | None         |
| Control    | Abdominal Pain    | Gastrointestinal Disorders                      | No      | Yes      | 13-Dec-21  | 13-Dec-21 | 2     | Probably                | None         |
| Control    | Abdominal Pain    | Gastrointestinal Disorders                      | No      | Yes      | 13-Dec-21  | 13-Dec-21 | 1     | Probably                | None         |
| Control    | Vomiting          | Gastrointestinal Disorders                      | No      | Yes      | 27-Dec-21  | 27-Dec-21 | 1     | Possible                | None         |
| Control    | Ectopic Pregnancy | Pregnancy, Puerperium, and Perinatal Conditions | Yes     | No       | 03-Mar-22  | 04-Mar-22 | 3     | Unlikely                | None         |
| Control    | Diarrhea          | Gastrointestinal Disorders                      | No      | Yes      | 07-Apr-22  | 16-Apr-22 | 2     | Probably                | None         |
| Control    | Nausea            | Gastrointestinal Disorders                      | No      | Yes      | 07-Apr-22  | 16-Apr-22 | 2     | Probably                | None         |
| Treatment  | Nausea            | Gastrointestinal Disorders                      | No      | Yes      | 21-Oct-21  | 21-Oct-21 | 1     | Probably                | None         |
| Treatment  | Heartburn         | Gastrointestinal Disorders                      | No      | No       | 21-Oct-21  | 12-Nov-21 | 1     | Definite                | None         |
| Treatment  | Bloating          | Gastrointestinal Disorders                      | No      | No       | 16-Nov-21  | 17-Nov-21 | 1     | Probably                | None         |
| Treatment  | Bloating          | Gastrointestinal Disorders                      | No      | No       | 16-Nov-21  | 16-Nov-21 | 1     | Possible                | None         |
| Treatment  | Nausea            | Gastrointestinal Disorders                      | No      | Yes      | 08-Dec-21  | 08-Dec-21 | 1     | Possible                | None         |
| Treatment  | Abdominal Pain    | Gastrointestinal Disorders                      | No      | Yes      | 02-Dec-21  | 02-Dec-21 | 1     | Possible                | None         |
| Treatment  | Nausea            | Gastrointestinal Disorders                      | No      | Yes      | 27-Dec-21  | 03-Jan-22 | 1     | Possible                | None         |

|           |                |                                                  |    |     |           |           |   |           |      |
|-----------|----------------|--------------------------------------------------|----|-----|-----------|-----------|---|-----------|------|
| Treatment | Nausea         | Gastrointestinal Disorders                       | No | Yes | 24-Dec-21 | 24-Dec-21 | 1 | Possible  | None |
| Treatment | Abdominal Pain | Gastrointestinal Disorders                       | No | Yes | 06-Jan-22 | 06-Jan-22 | 1 | Probably  | None |
| Treatment | Nausea         | Gastrointestinal Disorders                       | No | Yes | 12-Jan-22 | 12-Jan-22 | 1 | Probably  | None |
| Treatment | Nausea         | Gastrointestinal Disorders                       | No | Yes | 17-Jan-22 | 17-Jan-22 | 1 | Probably  | None |
| Treatment | Jaw Pain       | Musculoskeletal and Connective Tissue Disorders  | No | No  | 17-Jan-22 | 03-Feb-22 | 2 | Unrelated | None |
| Treatment | Nausea         | Gastrointestinal Disorders                       | No | Yes | 26-Jan-22 | 29-Jan-22 | 1 | Possible  | None |
| Treatment | Dyspepsia      | Gastrointestinal Disorders                       | No | Yes | 18-Jan-22 | 01-Feb-22 | 1 | Probably  | None |
| Treatment | Epistaxis      | Respiratory, Thoracic, and Mediastinal Disorders | No | No  | 05-Apr-22 | 05-Apr-22 | 1 | Unlikely  | None |
| Treatment | Nausea         | Gastrointestinal Disorders                       | No | Yes | 12-Apr-22 | 14-Apr-22 | 1 | Probably  | None |

Adverse events were categorized using the Common Terminology for Criteria for Adverse Events, version 5.0. Adverse events were collected during the intervention period plus one additional week after stopping the investigational product. Adverse events were not collected if they were deemed normal symptoms of COVID-19, except if classified as gastrointestinal. Expected adverse events determined through literature review and clinical experience.
